# Supplementary material for: Cu2+-mediated fluorescence switching of gold nanoclusters for the selective detection of clioquinol
Source: Royal Society of Chemistry journal article supplement (doi:10.1039/c5an01975c), 2015-01-01
Supplement: c5an01975c1.pdf [file c5an01975c1.pdf]

## SUPPORTING INFORMATION

*for*

### **Cu<sup>2+</sup>-mediated fluorescence switch of gold nanoclusters for the selective detection of clioquinol**

**Jian Wang,<sup>a</sup> Yong Chang,<sup>b</sup> Pu Zhang,<sup>c</sup> Shao Qing Lie,<sup>b</sup> Peng Fei Gao,<sup>a</sup> Cheng Zhi Huang<sup>\*,a,b</sup>**

<sup>a</sup> *Key Laboratory of Luminescent and Real-Time Analytical Chemistry (Southwest University) Ministry of Education, College of Pharmaceutical Science, Southwest University, Chongqing 400715, China. E-mail: chengzhi@swu.edu.cn, Tel: (+86) 23 68254659, Fax: (+86) 23 68367257.*

<sup>b</sup> *Chongqing Key Laboratory of Biomedical Analysis (Southwest University), Chongqing Science & Technology Commission, College of Chemistry and Chemical Engineering, Southwest University, Chongqing 400715, China.*

<sup>c</sup> *College of Physical Science and Technology, Southwest University, Chongqing 400715, China*

## Figures

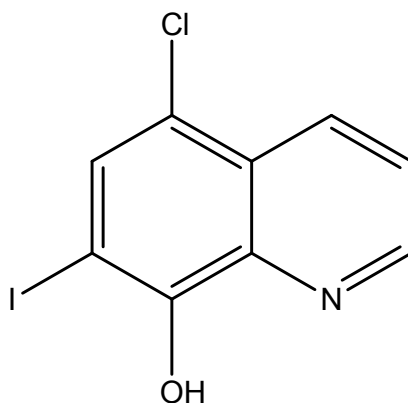

**Fig. S1** The molecule structure of CQ

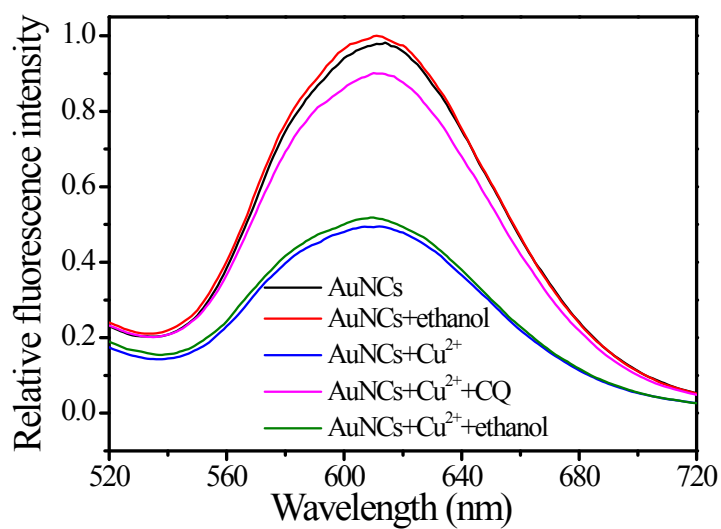

**Fig. S2** The effect of ethanol on the fluorescence of BSA-AuNCs. Conditions: BSA-AuNCs, 0.192 mg/mL; Cu<sup>2+</sup>, 6  $\mu$ M; CQ, 10  $\mu$ M; pH 7.0, Tris-HCl buffer.

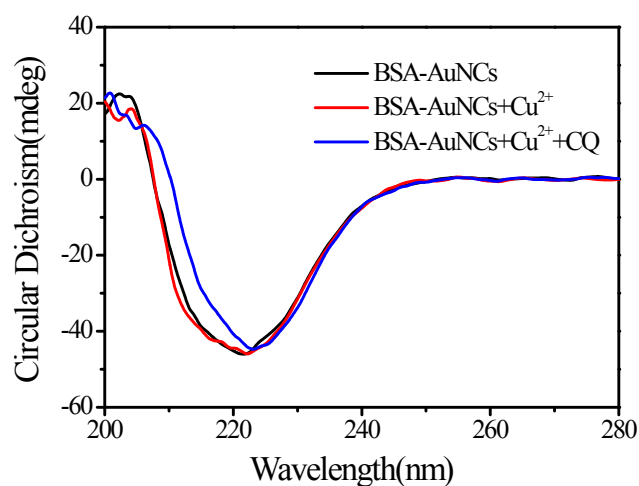

**Fig. S3** The circular dichroism spectra of BSA-AuNCs, BSA-AuNCs-Cu<sup>2+</sup> and BSA-AuNCs-Cu<sup>2+</sup>-CQ. Conditions: BSA-AuNCs, 0.192 mg/mL; Cu<sup>2+</sup>, 6 μM; CQ, 10 μM; pH 7.0, Tris-HCl buffer.

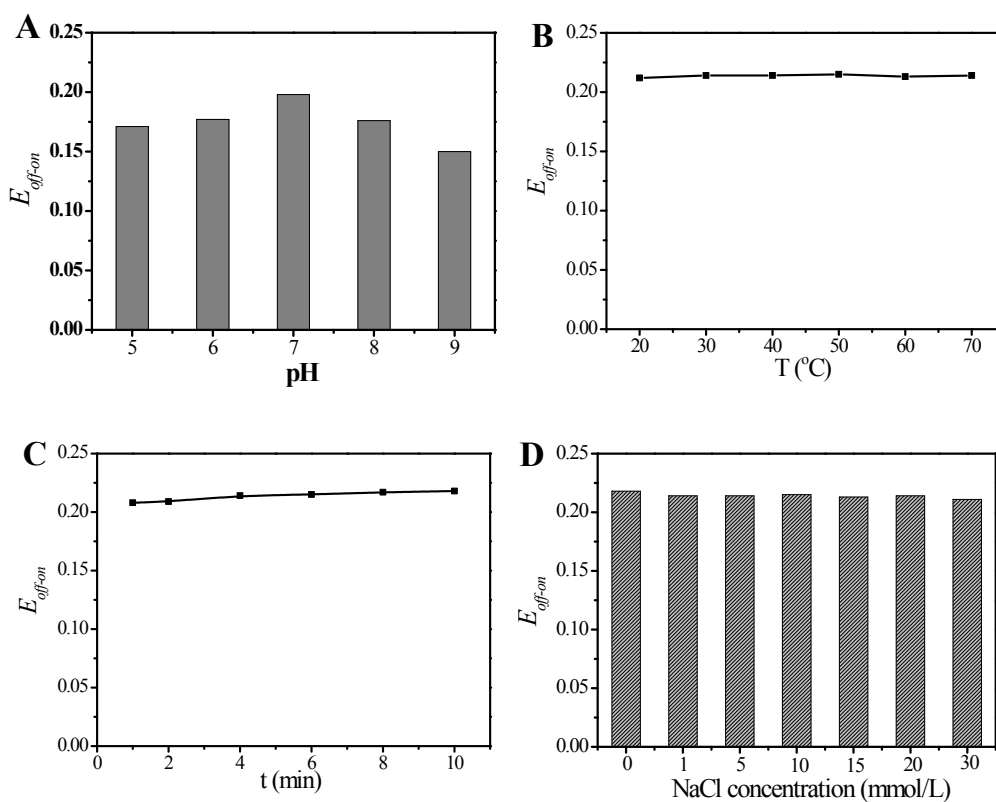

**Fig. S4** Dependence of the fluorescence response of BSA-AuNCs on (A) pH; (B) reaction temperature; (C) incubation time; (D) concentration of NaCl. Conditions: BSA-AuNCs, 0.192 mg/mL; Cu<sup>2+</sup>, 6 μM; CQ, 10 μM.

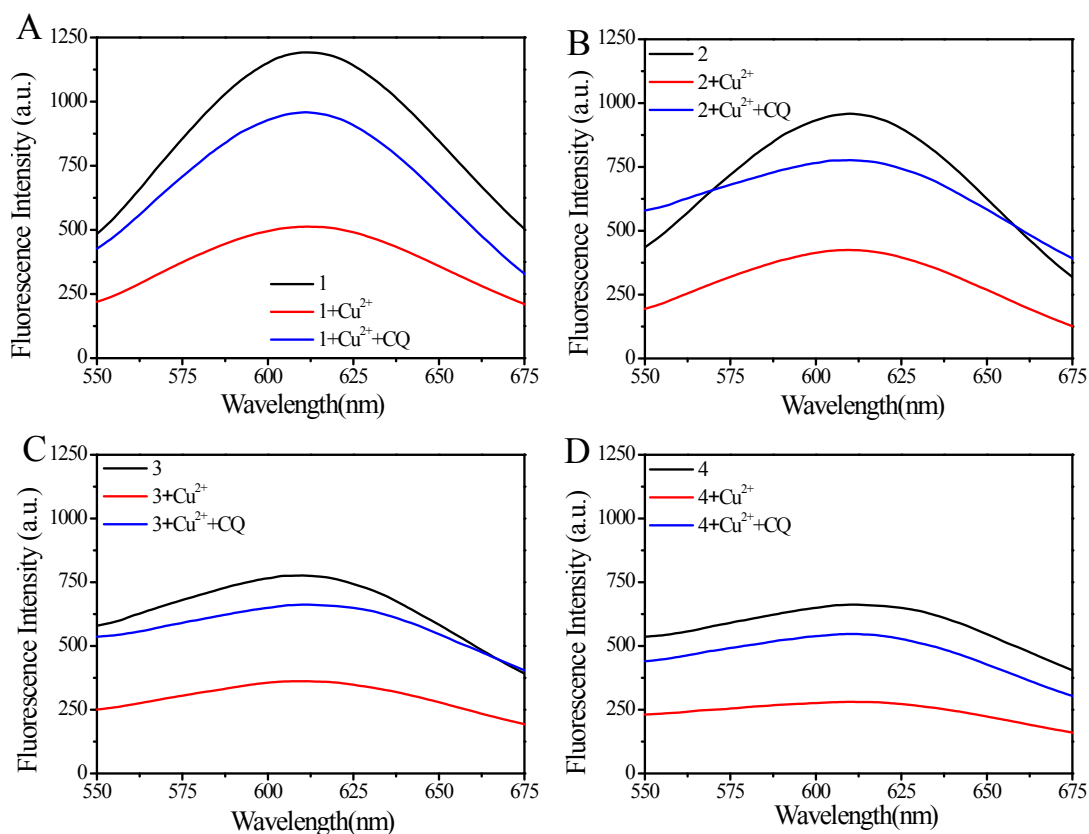

**Fig. S5** The reusability of AuNCs for sensing CQ. A, the first cycle; B, the second cycle; C, the third cycle; D, the fourth cycle. 1, AuNCs; 2, AuNCs+Cu<sup>2+</sup>+CQ; 3, AuNCs+Cu<sup>2+</sup>+CQ+Cu<sup>2+</sup>+CQ; 4, AuNCs+Cu<sup>2+</sup>+CQ+Cu<sup>2+</sup>+CQ+Cu<sup>2+</sup>+CQ. Conditions: BSA-AuNCs, 0.192 mg/mL; Cu<sup>2+</sup>, 6  $\mu$ M for each cycle; CQ, 10  $\mu$ M for each cycle; pH 7.0, Tris-HCl buffer.

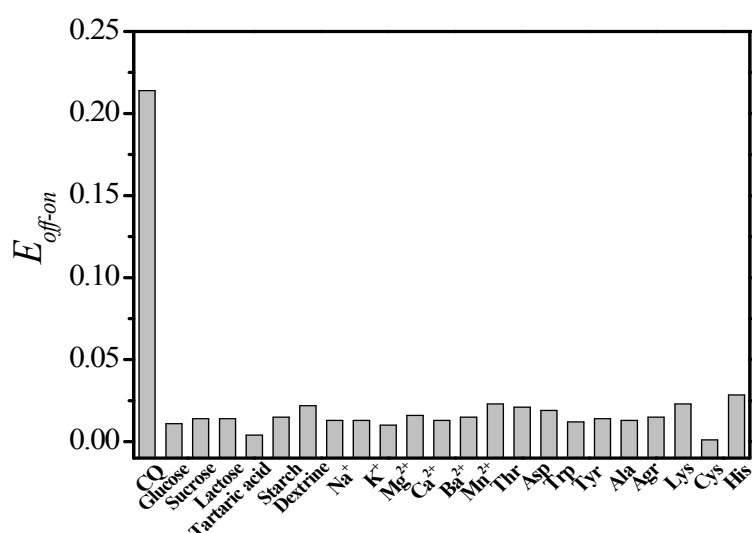

**Fig. S6** The selectivity of the fluorescent probe for CQ detection. Conditions: BSA-AuNCs, 0.192 mg/mL; Cu<sup>2+</sup>, 6  $\mu$ M; CQ, 10  $\mu$ M; glucose, sucrose, lactose, and tartaric acid, 100  $\mu$ M; starch and dextrin, 100  $\mu$ g/mL; His, 10  $\mu$ M; other metal ions, 6  $\mu$ M; other amino acids, 100  $\mu$ M; pH 7.0, Tris-HCl buffer.
